# Supplementary material for: Surf4 (Erv29p) binds amino-terminal tripeptide motifs of soluble cargo proteins with different affinities, enabling prioritization of their exit from the endoplasmic reticulum
Source: PLoS Biol. 2018 Aug 7;16(8):e2005140. doi: 10.1371/journal.pbio.2005140 (PMC6097701; doi:10.1371/journal.pbio.2005140)
Supplement: S2 Table — (XLSX) [file pbio.2005140.s008.xlsx]

## Sheet: Negative
Category	Protein	Tripeptide			Taxon	Sequence	Species	Accession Number
Chaperones	GRP78	E	E	E	Mammal	ARA EEE DKKEDVGTVVGIDLGTTYSC	Homo sapiens	NP_005338.1
		E	E	E	Bird	ARA EEE EKKEDVGTVVGIDLGTTYSC	Aquila chrysaetos canadensis	XP_011577835.1
		E	D	E	Mammal	VRA EDE DKKEDVGTVVGIDLGTTYSC	Peromyscus maniculatus bairdii	XP_006988789.1
		E	D	E	Fish	VYA EDE DKKESVGTVIGIDLGTTYSC	Austrofundulus limnaeus	XP_013864862.1
		D	E	E	Mammal	ARA DEE DKKEDVGTVVGIDLGTTYSC	Myotis brandtii	XP_005881560.1
		D	E	E	Bird	ARA DEE EKKEDVGTVVGIDLGTTYSC	Melopsittacus undulatus	XP_005146335.1
		D	E	E	Fish	VFA DEE DKKESVGTVVGIDLGTTYSC	Latimeria chalumnae	XP_005987377.1
		D	D	E	Fish	VFA DDE DKRESVGTVVGIDLGTTYSC	Latimeria chalumnae	XP_014345968.1
		D	D	E	Bird	ARA DDE EKKEDVGTVVGIDLGTTYSC	Coturnix japonica	XP_015734935.1
		Q	D	E	Reptile	VFT QDE DKKEEVGTVVGIDLGTTYSC	Anolis carolinensis	XP_003230508.1
		E	E	D	Mammal	ARA EED DKKEDVGTVVGIDLGTTYSC	Phascolarctos cinereus	XP_020823227.1
		E	E	D	Reptile	ARA EED DKKEDVGTVVGIDLGTTYSC	Alligator mississippiensis	XP_006271368.2
		D	E	D	Mammal	ARA DED DKKEDVGTVVGIDLGTTYSC	Sarcophilus harrisii	XP_012409173.1
		D	E	D	Reptile	ARA DED DKKEDVGTVVGIDLGTTYSC	Crocodylus porosus	XP_019396585.1
		D	D	D	Mammal	ARP DDD DKKEDVGTVVGIDLGTTYSC	Ornithorhynchus anatinus	XP_003431001.1
		D	D	D	Amphibian	TFA DDD DKKEDVGTVIGIDLGTTYSC	Nanorana parkeri	XP_018426498.1
		D	D	D	Fish	VFA DDD DKRENVGTVVGIDLGTTYSC	Cynoglossus semilaevis	XP_008324203.1
		D	D	D	Reptile	VFA DDD DKKEEVGTVVGIDLGTTYSC	Thamnophis sirtalis	XP_013910585.1
	GRP94	E	D	E	Mammal	VRA EDE VDVDGTVEEDLGKSREGSR	Sus scrofa	XP_020946788.1
		E	D	E	Amphibian	VQA EDE VEVDATVEDDIGKSRDGSR	Xenopus tropicalis	NP_001039228.1
		E	D	E	Fish	VRA EDE LDIDGAVEDDLGKSR	Oncorhynchus mykiss	NP_001181938.1
		D	D	E	Mammal	VRA DDE VDVDGTVEEDLGKSREGSR	Chinchilla lanigera	XP_005374635.1
		D	D	E	Fish	VKA DDE IDVDGTVEDDLGKSRDGSR	Stegastes partitus	XP_008281449.1
		D	G	E	Mammal	VRA DGE VDVDGTVEEDLGKSR	Trichechus manatus latirostris	XP_004373828.1
		E	E	D	Fish	VRA EED DLDIDGTVEDDLGKSR	Clupea harengus	XP_012674248.1
		E	D	D	Amphibian	VHA EDD VEVDATVEDDIGKSRDGSR	Xenopus laevis	NP_001084280.1
		E	D	D	Fish	VRA EDD VDVDGTVEDDLGKSRDGSR	Nothobranchius furzeri	SBP55229.1
		D	D	D	Fish	VKA DDD VDIDGTVEEDLGKSR	Danio rerio	NP_937853.1
		D	G	D	Mammal	VRA DGD EVDVEGTVEEDLGKSR	Erinaceus europaeus	XP_007527982.1
		E	E	P	Reptile	AQA EEP DVDGTVEDDLGKSREGSR	Protobothrops muscrosquamatus	XP_015679347.1
		D	D	P	Mammal	VKA DDP VDVEATVEEDLGKSR	Monodelphis domestica	XP_001365625.1
		D	D	P	Reptile	ALA DDP DVDGTVEDDLGKSRDGSR	Thamnophis sirtalis	XP_013931632.1
		D	D	Q	Mammal	VKA DDQ LDVEATVEEDLGKSREGSR	Sarcophilus harrisii	XP_003772640.1
		E	D	N	Fish	VTA EDN DAEVEGMVEEDLGKSR	Scleropages formosus	XP_018585655.1
		E	E	V	Bird	VTA EEV DVDATVEEDLGKSR	Gallus gallus	NP_989620.1
		E	E	L	Reptile	ARA EEL DVDGTVEDDLGKSREGSR	Chrysemus picta bellii	XP_005310776.1
		E	D	L	Reptile	VRA EDL DVDATVEDDLGKSREGSR	Pelodiscus sinensis	XP_006138079.1
		D	E	L	Reptile	AQA DEL DVDGTVEDDLGKSREGSR	Python bovittatus	XP_007438500.1
		D	E	I	Reptile	AQA DEI DVDGTVEDDLGKSREGSR	Anolis carolinensis	XP_003220951.1
		D	E	V	Mammal	VRA DEV DVDGTVEEDLGKSREGSR	Chrysochloris asiatica	XP_006871146.1
		D	E	V	Fish	ARA DEV VDADGTVVDDLGKSRDGSR	Latimeria chalumnae	XP_006004184.1
		D	E	V	Reptile	VRA DEV EVDARLEDDMGKSREGSR	Alligator mississippiensis	NP_001274194.1
		D	A	E	Mammal	VRA DAE VDVDGTVEADLGKSREGSR	Saimiri boliviensis boliviensis	XP_003929672.1
		D	N	E	Mammal	VRA DNE VDVDGTVEEDLGKSR	Odobenus rosmarus divergens	XP_004414318.1
		S	D	E	Fish	VRA SDE ELDVDGAVEEDLGKSR	Lepisosteus oculatus	XP_015207436.1
		N	D	E	Fish	VKA NDE DVDGTVEEDLGKSR	Neolamprologus brichardi	XP_006782653.1
	PDIA2	D	E	E	Fish	ARA DEE NTEEKSEEKVEDNSEED	Danio rerio	NP_001307463.1
		E	G	E	Reptile	SWG EGE EDQGKEVEVQQKEEVK	Alligator mississippiensis	XP_006277763.1
		Q	E	P	Mammal	PRG QEP GPGGPSEEPPEEEIPEE	Rhinolophus sinicus	XP_019611734.1
		Q	D	P	Mammal	GQG QDP PGPLEDLPEEPPGEKVPKE	Heterocephalus glaber	XP_004873762.1
		Q	G	P	Mammal	GQA QGP EGPSEEPPEEPPGEEVP	Carlito syrichta	XP_021572871.1
		Q	E	Q	Mammal	PWS QEQ GPESPSEEPPEEEFPKE	Colobus angelensis palliatus	XP_011815470.1
		Q	G	Q	Mammal	PWG QGQ GPKSPSEEPPEEEIPRE	Cercocebus atys	XP_011890936.1
		E	E	K	Bird	LRG EEK DGEMVVEEDEMLSDELGEE	Melopsittacus undulatus	XP_005152789.1
		Q	N	D	Amphibian	AFG QND ATEEPTKSSSEEET	Xenopus laevis	NP_001083648.1
		G	E	E	Bird	ALG GEE EDGAVVAEEEEDEDEVLSD	Falco peregrinus	XP_005244232.1
		G	E	G	Bird	AVG GEG EDGEEVAEEGEAEGEVLSD	Cuculus canorus	XP_009567320.1
		H	E	Q	Mammal	PWG HEQ GPRSPSEEPPEEEIPKE	Pongo abelii	NP_001125285.1
		A	G	E	Mammal	GEG AGE EGVEAPEEATPEPPS	Monodelphis domestica	XP_007499252.1
		L	G	P	Mammal	GQG LGP GGSSEEPPEEAVPEE	Erinaceus europaeus	XP_007528033.1
	PDIA4	Q	E	E	Amphibian	AKC QEE EEEEEAQGEESVFKDDDDDD	Anolis carolinensis	XP_003222269.1
		Q	E	D	Mammal	ADA QED ASDTENAIEDEEEEEE	Peromyscus maniculatus bairdii	XP_006995482.1
		Q	E	D	Bird	LVA QED GRESVTQEVDGDDDEEEEE	Gallus gallus	XP_015131335.1
		E	E	P	Mammal	ASA EEP DADSLNPEDATEDEDEEEE	Dasypus novemcinctus	XP_004484292.1
		Q	E	P	Mammal	ACA QEP DADSPSRDDAIEDEDAEDED	Trichechus manatus latirostris	XP_004382408.1
		E	G	P	Mammal	AGA EGP DEDSSNRENAIEDEEEEEEE	Homo sapiens	XP_006716248.1
		D	G	P	Mammal	AGA DGP DEDSSNKENAIEDEEEEEE	Cebus capucinus imitator	XP_017358395.1
		E	G	T	Mammal	ASA EGT DEDASEREDAIEDEEEEED	Ictidomys tridecemlineatus	XP_005326693.1
		Q	G	T	Mammal	AGA QGT DEDSSNGENAIEDEEEEEE	Microcebus murinus	XP_012623621.1
		E	D	A	Mammal	ASA EDA HEDASDTENAIEDEEEEED	Microtus ochrogaster	XP_005372066.1
		Q	E	A	Mammal	ASA QEA DEEENAIEDEEEEEE	Ochotona princeps	XP_004597858.1
		G	E	P	Mammal	ASA GEP DEDSNKEDAIEEEDEEEDE	Pteropus vampyrus	XP_011363804.1
		G	G	P	Mammal	ASA GGP DEDSSNKEDAIEDEEEEE	Felis catus	XP_003983243.1
		G	G	A	Mammal	ASA GGA DEDSPDKENAIEDEEDEDD	Chinchilla lanigera	XP_005404798.1
		T	C	N	Amphibian	AII TCN QEEKGPEEHSDDEDTSEDE	Xenopus tropicalis	XP_002941424.1
		H	R	C	Fish	IKP HRC EDDAKDDSAEDLGEEEDD	Danio rerio	NP_956073.2
		A	D	E	Mammal	VDG ADE DSPDRENAIEDEDEEED	Cavia porcellus	XP_003475406.1
		A	G	P	Mammal	LAA AGP DGDSSNKEDAIEDEEEEDD	Canis lupus familiaris	XP_848238.3
		A	G	G	Mammal	VSG AGG PDEDSSNKEDAIEEEEEEEEEEDEDEEDD	Camelus bactrianus	XP_010953149.1
		R	E	A	Mammal	ASA REA DEDSSNGENAIDEEDEEEEEDEEEEDD	Tupaia chinensis	XP_014438750.1
		A	S	A	Mammal	LVA ASA GGPDEDSSNKEDAIEDEEEEEEDDEEEEDDD	Mustela putorius furo	XP_004765952.1
	CALR	D	V	Y	Fish	AHA DVY FKEQFLDGDGWKSRW	Danio rerio	NP_571122.2
		E	P	T	Mammal	AVA EPT VYFKEQFLDGDGWTNRW	Galeopterus variegatus	XP_008564873.1
		D	P	T	Mammal	AAA DPT VYFKEQFLDGDGWTERW	Capra hircus	XP_005682356.3
		E	P	V	Mammal	AVA EPV VYFKEQFLDGDGWTNRW	Sorex araneus	XP_004616666.1
		E	P	I	Mammal	AAA EPI VYFKEQFLDGDGWTDRW	Trichechus manatus latirostris	XP_004389798.1
		E	P	A	Mammal	AVA EPA VYFKEQFLDGDGWTSRW	Homo sapiens	NP_004334.1
		E	P	A	Amphibian	CIA EPA VYFKEEFTDGDGWTQRW	Xenopus laevis	NP_001080096.1
		E	P	A	Fish	VLA EPA VYLREQFEDGDAWTSRW	Takifugu rubripes	XP_011613141.1
		D	P	A	Mammal	AAA DPA IYFKEQFLDGDAWTNRW	Mus musculus	NP_031617.1
		D	P	A	Amphibian	CIA DPA VYLKEEFADGDGWSQRW	Xenopus tropicalis	NP_001001253.1
		Q	P	V	Mammal	AAA QPV VYFKEQFLDGDGWANRW	Erinaceus europaeus	XP_007532492.1
		T	V	F	Fish	TNA TVF FKEQFLDGDGWKSRW	Astyanax mexicanus	XP_007246247.1
		K	P	S	Mammal	AAA KPS VYFKEQFLDGDGWTHRW	Propithecus coquereli	XP_012496846.1
		R	V	Y	Fish	VDA RVY FKEQFLDGDGWKSRW	Oreochromis niloticus	XP_013129008.1
	ERO1	Q	Q	E	Amphibian	SNS QQE QSSAAQRCFCQVTGYLDDC	Xenopus tropicalis	NP_001016058.1
		E	E	Q	Mammal	GHG EEQ PPETAAQRCFCQVSGYLDDC	Homo sapiens	NP_055399.1
		E	Q	Q	Mammal	GHG EQQ PSETAAQRCFCQVSGYLDDC	Bos taurus	NP_001096818.1
		Q	E	Q	Reptile	AAA QEQ PPGAAGSAERRCFCQVTGYLDDC	Gekko japonicus	XP_015276907.1
		D	Q	Q	Mammal	GRG DQQ PPETAAQRCFCQVSGYLDDC	Dipodomys ordii	XP_012867788.1
		E	E	A	Reptile	GAS EEA PTAEQRCFCQVTGHLDDC	Protobothrops mucrosquamatus	XP_015673270.1
		Q	E	A	Amphibian	TIA QEA PASAAQRCFCQVTGYLDDC	Xenopus laevis	XP_018086018.1
		E	Q	R	Mammal	SHG EQR PPETAAQRCFCQVSGYLDDC	Canis lupus familiaris	XP_547813.2
		Q	P	P	Reptile	ASA QPP TAEQRCFCQVTGHLDDC	Python bovittatus	XP_007424173.1
		H	E	E	Mammal	TSG HEE QQPPETAAQRCFCQVSGYLDDC	Rhinopithecus roxellana	XP_010370374.1
		G	Q	P	Reptile	AAA GQP LPGSAEQRCFCQVTGYLDDC	Chrysemys picta bellii	XP_008166827.1
		G	Q	Q	Mammal	GHG GQQ PPETAAQRCFCQVSGYLDDC	Physeter catodon	XP_007119282.1
		G	Q	R	Mammal	GRG GQR PAETAAQRCFCQVSGYLDDC	Dasypus novemcinctus	XP_004449402.1
		G	S	A	Fish	TTA GSA AHRCFCQVTGTLDDC	Danio rerio	NP_956644.2
		G	P	Q	Mammal	GRG GPQ SRETAAQRCFCQVSGYLDDC	Condylura cristata	XP_004681925.1
		R	Q	Q	Mammal	GYG RQQ PSETAAQRCFCQVSGYLDDC	Sus scrofa	NP_001131099.1
		A	G	S	Fish	TTA AGS AAHRCFCQVTGNLDDC	Sinocyclocheilus rhinocerous	XP_016423017.1
		R	C	F	Fish	ADS RCF CQVTGNLDDC	Cynoglossus semilaevis	XP_008335408.1
	F-GRP78	Q	E	D	Fungal	AHA QED DSVQENYGTVIGIDLG	Aspergillus nidulans	XP_659666.1
		D	D	T	Fungal	AKA DDT ENYGTVIGIDLG	Diaporthe ampelina	KKY33374.1
		D	D	S	Fungal	VNA DDS ENYGTVIGIDLG	Purpureocillium lilacinum	XP_018174643.1
		E	E	S	Fungal	AAA EES ENYGTVIGIDLG	Acremonium chrysogenum	KFH42267.1
		Q	A	P	Fungal	VQA QAP DSENYGTVIGIDLG	Colletotrichum gloeosporioides	EQB51375.1
		D	S	E	Fungal	VFA DSE KNETENYGTVIGIDLG	Schizosaccharomyces octosporus	XP_013016160.1
		S	E	D	Fungal	VHA SED SASNDTHNYGTVIGIDLG	Phaeomoniella chlamydospora	KKY16662.1
		S	G	D	Fungal	AFA SGD DNSTESYGTVIGIDLG	Schizosaccharomyces pombe	NP_593245.1
		G	K	E	Fungal	AFA GKE SNSTENYGTVIGIDLG	Schizosaccharomyces japonicus	XP_002172057.1
		N	S	E	Fungal	VFA NSE KNETENYGTVIGIDLG	Schizosaccharomyces cryophilus	XP_013024242.1
		A	D	D	Fungal	VRG ADD VENYGTVIGIDLGTT	Saccharomyces cerevisiae	NP_012500.3
		A	E	N	Fungal	VQA AEN GTESYGTVIGIDLG	Pyronema omphalodes	CCX16990.1
		A	V	D	Fungal	ALA AVD NDTENYGTVIGIDLG	Cyberlindnera fabianii	CDR39394.1
		L	A	A	Fungal	GQA LAA AGEDNDTESYGTVIGIDLG	Debaryomyces fabryi	XP_015464817.1
		A	P	E	Fungal	AVA APE NDTENYGTVIGIDLG	Cyberlindnera jadinii	XP_020073457.1
	PDI	Q	E	E	Yeast	AAA QEE ATAPEDSAVIKLTSET	Kluyveromyces marxianus	XP_022673588.1
		Q	Q	E	Yeast	VFA QQE AVAPEDSAVVKLATDS	Saccharomyces cerevisiae	NP_009887.1
		Q	E	D	Yeast	ALA QED AIAPEDSDVVKLSGKDFES	Vanderwaltozyma polyspora	XP_001646994.1
		Q	G	D	Yeast	CSA QGD AVAPEDSAVVKLDADT	Kluyveromyces lactii	XP_452244.1
		Q	E	Q	Yeast	TLA QEQ SAIAPEDSHVVKLSQDS	Hanseniaspora uvarum	OEJ92874.1
		Q	E	G	Yeast	VLA QEG AVAPEDSAVVKLTSE	Torulaspora delbrueckii	XP_003680772.1
		Q	G	G	Yeast	VQA QGG EATAPEDSSVVKLNAET	Tetrapisispora blattae	XP_004177816.1
		Q	E	A	Yeast	GMA QEA AAPADSAVVRLTSENFKDF	Kazachstania africana	XP_003956812.1
		E	E	A	Yeast	ARA EEA TAPEDSKVVKLGLEDF	Eremothecium cymbalariae	XP_003644111.1
		Q	D	A	Yeast	AQA QDA TAPEDSAVVKLTGETF	Eremothecium gossypii	NP_986266.2
		E	D	A	Yeast	VRA EDA VAPEDSAVVKLTQDT	Pichia kudriavzevii	XP_020546126.1
		Q	F	P	Yeast	TQG QFP SAVAPEDSAVIKLTGE	Naumovozyma castellii	XP_003672983.1
		N	E	E	Yeast	VAA NEE AIAPEDSQVVKLGKDN	Tetrapisispora phaffii	XP_003684589.1
		V	D	E	Yeast	AAA VDE NPAVASADSAVVKLTSDKF	Kuraishia capsulata	CDK29929.1
		A	G	D	Yeast	GLA AGD EAAIAPADSAVVKLTAD	Cyberlindnera jadinii	XP_020072714.1
TANGO 1 (Fibrillar Collagens)	COL1A1	Q	E	E	Mammal	THG QEE GQVEGQDEDIPPITCVQN	Macaca mulatta	XP_014974803.1
		Q	D	E	Mammal	THG QDE EDIPEGTCVQNGLKYHN	Sarcophilus harrisii	XP_003768423.1
		Q	G	E	Fish	ARG QGE DDRTGGSCTLDGQVYN	Danio rerio	NP_954684.1
		E	E	D	Reptile	GQG EED IPSVTCIQDGVTYN	Gekko japonicus	XP_015269157.1
		E	E	D	Bird	GQG EED IQTGSCVQDGLTYN	Lepidothrix coronata	XP_017694230.1
		E	D	D	Reptile	GQG EDD VPSGNCIQDGLTYS	Pelodiscus sinensis	XP_014426591.1
		Q	E	D	Mammal	THG QED GQVEGQDEDIPPITCVQN	Gorilla gorilla gorilla	XP_004041373.1
		Q	G	D	Mammal	THG QGD IPEITCIHNGVKIPN	Cricetulus griseus	XP_007615453.1
		Q	E	Q	Mammal	THG QEQ GQEEDIPSVTCIQDGN	Condylura cristata	XP_004684395.1
		Q	Q	Q	Mammal	THG QQQ VVDQDRDIPGVECVHN	Cavia porcellus	XP_013004992.1
		Q	E	T	Fish	DHG QET GEVEEEDEDI	Notothenia coriiceps	XP_010769450.1
		Q	G	T	Fish	ARA QGT GASCTLEGQVFADRDVWK	Poecilia latipinna	XP_014880317.1
		Q	E	K	Mammal	THG QEK GQEEDIPPVTCIQN	Sorex araneus	XP_004608727.1
		Q	E	F	Mammal	TNG QEF GQEFGQEAGQEEDIPAITCIQN	Elephantulus edwardii	XP_006889362.1
		Q	E	A	Mammal	THG QEA DEVVRQHEDIPKISCI	Dipodomys ordii	XP_012893546.1
		Q	T	E	Mammal	THG QTE GEVNDQEGDIPGVDCIQN	Marmota marmota marmota	XP_015350975.1
		Q	V	D	Mammal	THG QVD IPEITCIHNGVKIPNGETWKA	Peromyscus maniculatus bairdii	XP_006972005.1
		Q	S	D	Mammal	THG QSD QGDDIDIPCVQNGVEYSDRDVWK	Dasypus novemcinctus	XP_012382008.1
	COL2A1	Q	E	E	Fish	VRC QEE DDQESGGCIQDGQLYNDKD	Neolamprologus brichardi	XP_006796582.1
		Q	E	E	Reptile	VRC QEE DIQEAGSCVQDGQRYSDKD	Crocodylus porosus	XP_019410234.1
		Q	D	E	Reptile	VQC QDE DIQEAGNCVQDGQRYSDKD	Anolis carolinensis	XP_008119414.1
		Q	D	E	Fish	VKC QDE EDVQEAGSCVQDGQRYSDKD	Lepisosteus oculatus	XP_006629302.1
		Q	D	E	Amphibian	VRC QDE EDVLDTGSCVQDGQRYSDKD	Xenopus laevis	NP_001081260.1
		E	D	D	Fish	CQG EDD AEVGSCVKDGQRYNDKD	Callorhinchus milii	XP_007908904.1
		Q	D	D	Mammal	CQG QDD EDAGSCLQDGQIYKDKD	Cricetulus griseus	XP_007632202.1
		Q	E	D	Amphibian	VRC QED DQEAGGCIQDGHGYNEKD	Esox lucius	XP_010896001.1
		Q	D	A	Mammal	CQG QDA QEAGSCVQDGQRYNDKD	Echinops telfairi	XP_004711487.1
		Q	G	L	Mammal	LRC QGL DAQEAGSCLQDGQRYKDKD	Nannospalax galili	XP_008839510.1
		Q	D	R	Bird	AAA QDR DLPEAGSCLQDGHRYSDKD	Pseudopodoces humilis	XP_005533325.1
		Q	D	L	Mammal	CQG QDL QEAGSCLQDGQRYNDKD	Ictidomys tridecemlineatus	XP_021581794.1
		Q	D	I	Mammal	CQA QDI QETGSCMQDGQRYNDKD	Elephantulus edwardii	XP_006888220.1
		Q	D	V	Mammal	CQG QDV QEAGSCVQDGQRYNDKD	Homo sapiens	XP_016874317.1
		Q	E	I	Mammal	CQG QEI QEAGSCEQSGRRYNDK	Condylura cristata	XP_004693227.1
		Q	N	E	Reptile	VNC QNE DIQEEGSCVQDGQRYSDKD	Protobothrops mucrosquamatus	XP_015672611.1
		Q	V	E	Fish	VRC QVE DDQEDAFSCVQDGQRYNDKD	Oreochromis niloticus	XP_003451887.1
		Q	L	D	Fish	VRC QLD DDLEDEFSCVQDGQRYNDKD	Oryzias latipes	XP_011473047.1
		L	D	A	Mammal	CQG LDA EEAGSCLHDGQTYKDKD	Peromyscus maniculatus bairdii	XP_006974414.1
		R	D	A	Mammal	CQG RDA QEGGGCVQEGQRYNDKD	Ochotona princeps	XP_004597906.1
		R	D	V	Mammal	CQG RDV QKAGGCVQDGERYNDKD	Dasypus novemcinctus	XP_004470498.1
	COL3A1	Q	Q	E	Mammal	ILA QQE AVEGGCSHLGQSYADRDVWK	Homo sapiens	NP_000081.1
		Q	Q	E	Reptile	ILA QQE VIETCSHLGQVYADRDVWK	Python bivittatus	XP_007431214.1
		Q	Q	D	Mammal	ILA QQD VTGGECSHLGRSYADRDVWK	Dasypus novemcinctus	XP_004477108.1
		Q	Q	D	Bird	ILA QQD ALGGCTHLGQEYADRDVWK	Gallus gallus	NP_990711.2
		Q	Q	D	Reptile	ILA QQD VILGSCTHLGQVYADRDVWK	Alligator mississippiensis	XP_014449841.1
		Q	D	G	Reptile	TLA QDG ACTHLGQVYADRDVWK	Chrysmeys picta bellii	XP_005306644.1
		Q	Q	Q	Mammal	ILA QQQ AVEGGCSHLGQSYADRDVWK	Mustela putorius furo	XP_004763420.1
		Q	Q	Q	Reptile	ILA QQQ EVAFGECSHFGQLYADRDVWK	Protobothrops mucrosquamatus	XP_015672533.1
		Q	Q	Q	Amphibian	ILA QQQ NVELGQCTHLGQVYADRDVWK	Xenopus laevis	NP_001083544.1
		Q	Q	G	Mammal	IWA QQG SIDESGCTHLGQTYESRDVWK	Microtus ochrogaster	XP_005366447.1
		Q	Q	N	Fish	ILA QQN QEAGDGGCSHLGQSYADRDVWK	Trichechus manatus latirostris	XP_004385664.1
		Q	Q	T	Mammal	ILA QQT QEAVEGGCTHLGQSYADRDVWK	Loxodonta africana	XP_010601077.1
		Q	Q	S	Mammal	ILA QQS NVDELGCSHLGQSYESRDVWK	Mus caroli	XP_021008327.1
		Q	Q	H	Mammal	ILA QQH PQEVIDAGCTHLGQSYADRDVWK	Monodelphis domestica	XP_001378458.2
		Q	Q	A	Fish	ILA QQA PAGGCTHLGQSYADRDVWK	Oryctolagus cuniculus	XP_002712379.1
		Q	Q	L	Mammal	ILA QQL PEAVDAGCTHLGQSYADRDVWK	Sarcophilus harrisii	XP_003764087.1
		Q	Q	V	Bird	ILA QQV ALGGCTHLGQAYADRDVWK	Taeniopygia guttata	XP_012430504.1
		Q	P	Q	Reptile	ILA QPQ NVVLGDCTHLGQVYADRDVWK	Anolis carolinensis	XP_008115785.1
	COL6A1	Q	D	E	Mammal	TAA QDE PETPRAVAFQDCPVDLFFVLD	Pan troglodytes	XP_016794160.1
		Q	D	E	Fish	VGA QDE NIKQSFRDCPVDLFFVLD	Cyprinodon variegatus	XP_015249479.1
		Q	D	D	Mammal	AAA QDD QEAARAIAFQDCPVDLFFVLD	Carlito syrichta	XP_008053736.1
		Q	E	P	Fish	ALA QEP EKRGIYFTDCPVDLFFVLD	Latimeria chalumnae	XP_005997002.1
		Q	G	P	Bird	SWA QGP EITTRVANAEDCPVDLFFVLD	Egretta garzetta	XP_009632971.1
		Q	Q	P	Reptile	ALA QQP EIVNNIKTFQDCPVDLFFVLD	Chrysemus picta bellii	XP_005282690.1
		Q	D	T	Mammal	AAA QDT EPSRAIAFQDCPVDLFFVLD	Otolemur garnettii	XP_003798147.1
		Q	D	N	Mammal	VAT QDN QIASKAIAFQDCPVDLFFVLD	Cavia porcellus	XP_013000445.1
		Q	D	N	Reptile	VLA QDN EITNGVAFRDCPVDLFFVLD	Gekko japonicus	XP_015278993.1
		Q	D	F	Mammal	VAA QDF QGPKAIAFQDCPVDLFFVLD	Microtus ochrogaster	XP_005360290.1
		Q	G	T	Reptile	VLA QGT EISSRVIAFQDCPVDLFFVLD	Python bivittatus	XP_007435254.1
		Q	G	S	Reptile	VLA QGS ELSNRVIAFQDCPVDLFFVLD	Thamnophis sirtalis	XP_013926137.1
		Q	Q	T	Reptile	TRA QQT QIIDRGETFQDCPVDLFFVLD	Pelodiscus sinensis	XP_014428608.1
		Q	Q	K	Amphibian	GMT QQK PQGPIKDPNGFPAVGPTITVRPGPGPEPERVTFQDCPVDVFFVLD	Xenopus tropicalis	XP_002932077.2
		Q	Q	R	Amphibian	GMT QQR PQGPIKDINGLPAQGPTVSVRPGPDPSDKVTFQDCPVDIFFVLD	Xenopus laevis	XP_018089590.1
		Q	D	A	Mammal	AAA QDA PGSARAVAFQDCPVDLFFVLD	Canis lupus familiaris	XP_003434049.2
		Q	D	A	Fish	IFA QDA QIPSFRECPVDLFFVLD	Sinocyclocheilus rhinoceros	XP_016380687.1
		Q	D	I	Mammal	VAA QDI PETARAIAFQDCPVDLFFVLD	Marmota marmota marmota	XP_015333860.1
		Q	D	I	Bird	SWA QDI SSRLHRAQDCPVDLFFVLD	Anas platyrhynchos	XP_005024802.1
		Q	D	V	Mammal	AAA QDV PGSARAVAFQDCPVDLFFVLD	Odobenus rosmarus divergens	XP_004410696.1
		Q	D	V	Fish	IFA QDV SRSSFRECPVDLFFVLD	Danio rerio	XP_009304444.1
		Q	D	L	Mammal	GAA QDL PEVPKAIAFQDCPVDLFFVLD	Ochotona princeps	XP_012784931.1
		Q	D	R	Mammal	ASA QDR PKAVAFQDCPVDLFFVLD	Sorex araneus	XP_004602373.1
		Q	Q	A	Bird	AWA QQA EINARVLRAQDCPVDLFFVLD	Gallus gallus	NP_990438.1
		Q	L	P	Fish	VGA QLP KERPHFADCPVDLFFVLD	Nothobranchius furzeri	XP_015812920.1
		Q	L	Q	Fish	AGA QLQ SQVTTFADCPVDLFFVLD	Oryzias latipes	XP_020566589.1
		Q	I	Q	Fish	AGA QIQ IGKPSFADCPVDLFFVLD	Fundulus heteroclitus	XP_012723792.1
		Q	T	Q	Fish	TEA QTQ DRKNRFADCPVDLFFVLD	Larimichthys crocea	XP_010748123.2
		Q	T	T	Fish	AGA QTT TQINKFADCPVDLFFVLD	Notothenia coriiceps	XP_010788712.1
		Q	N	Q	Fish	AGA QNQ IQRSTFADCPVDLFFVLD	Xiphophorus maculatus	XP_005813733.1
		Q	R	E	Fish	AGA QRE IQGSRFAECPVDLFFVLD	Stegastes partitus	XP_008286724.1
		Q	R	P	Bird	LWA QRP EITTRATNAEDCPVDLFFVLD	Leptosomus discolor	XP_009951423.1
		Q	R	Q	Fish	MQT QRQ RNPFQDCPVDLFFVLD	Clupea harengus	XP_012678897.1
		Q	R	Q	Bird	AWA QRQ DITTRVANAEDCPVDL	Tauraco erythrolophus	XP_009991139.1
		Q	R	T	Bird	LWA QRT EITTQVANAQDCPVDLFFVLD	Struthio camelus australis	XP_009678859.1
		V	S	P	Fish	AAA VSP IPKAGFAECPVDLFFVLD	Austrofundulus limnaeus	XP_013864426.1
	COL6A2	Q	D	E	Reptile	LQA QDE VDFLDYRPTTCVGKTDCP	Alligator mississippiensis	XP_006261051.1
		Q	G	Q	Fish	VHA QGQ TPAGSSCSPIKSTECP	Danio rerio	XP_009304443.2
		Q	D	C	Fish	VYG QDC NKKPECP	Astyanax mexicanus	XP_007252649.1
		Q	Q	Q	Mammal	IQA QQQ EVISPDTTERNNNCPEKTDCP	Gorilla gorilla gorilla	XP_018873277.1
		Q	D	L	Fish	VRS QDL EPRGPRPPPNSGGCLAKPDCL	Callorhinchus milii	XP_007898246.1
		Q	E	V	Fish	THA QEV VVHGARPNNGGPSPPCSGKVLCP	Latimeria chalumnae	XP_006014655.1
		Q	I	P	Fish	TQG QIP PTQTPCSKVTECP	Cyprinus carpio	XP_018935342.1
		Q	F	D	Bird	LHA QFD DEPVTSCTEKTDCP	Gallus gallus	NP_990679.1
		Q	Y	D	Reptile	LQA QYD VDDILYSPRSAGCPEKIDCP	Chrysemys picta bellii	XP_008173419.1
		Q	T	G	Fish	THA QTG ECSKKRKCP	Nothobranchius furzeri	XP_015812916.1
		Q	A	F	Fish	AAA QAF QECNKKHECP	Salmo salar	XP_014021267.1
		Q	A	S	Fish	THG QAS NQGCSKKTECA	Lepisosteus oculatus	XP_006636788.1
		E	K	A	Fish	THA EKA DCNQRKECP	Poecilia latipinna	XP_014916185.1
		E	K	V	Fish	THA EKV DCNQRRASSQVADECP	Xiphophorus maculatus	XP_014329866.1
		Q	K	A	Fish	THA QKA ECSKKQGLSETRECP	Austrofundulus limnaeus	XP_013864429.1
		Q	N	D	Reptile	LYA QND EGTSCADKTECP	Protobothrops mucrosquamatus	XP_015681015.1
		K	K	A	Fish	THA KKA ECNEKRECP	Cyprinodon variegatus	XP_015249477.1
		A	Q	L	Bird	LHA AQL DVDVGDVSPTSCAEKRNCP	Ficedula albicollis	XP_005048988.1
	COL6A3	Q	D	D	Fish	LHA QDD CARGSAADVYFLVDSSWSM	Poecilia latipinna	XP_014876070.1
		Q	D	D	Amphibian	VDA QDD SADLVFLIDGSNNVGRSDFSY	Xenopus tropicalis	XP_012826675.1
		Q	E	D	Fish	LDA QED EDCAQGLAADMYFLVDSSWSM	Maylandia zebra	XP_014263129.1
		Q	Q	Q	Mammal	THA QQQ QAVIEVNKRDIVFLVDGSS	Gorilla gorilla gorilla	XP_004033465.1
		Q	Q	Q	Bird	VGA QQQ AVIEVNKKDIVFLIDGS	Gallus gallus	XP_015144641.1
		Q	Q	Q	Reptile	TQA QQQ EIVEVNRKDIVFLVDGTT	Pogona vitticeps	XP_020658037.1
		Q	D	S	Fish	LDA QDS PDSADLVLLIDGSQNVGEANFPFVRDLVLKIID	Takifugu rubripes	XP_011611980.1
		Q	Q	T	Fish	SNA QQT NAQSIGAADIIFLVDSSWS	Latimeria chalumnae	XP_014344740.1
		Q	Q	L	Reptile	VDA QQL VRIVAAADIIFLVDSSWS	Chrysemys picta bellii	XP_008173850.1
		Q	D	A	Fish	LHA QDA PDSADLIFLIDGSQNVGAANFLYVREWLLRVIE	Cyprinodon variegatus	XP_015252471.1
		Q	N	A	Fish	LEA QNA LAVGKRDIIFLIDSSMGTIAINAVREFIKRFID	Sinocyclocheilus grahami	XP_016093254.1
	COL7A1	Q	G	Q	Fish	STA QGQ CNNVVAADIVFLVDGSSSIGRANFVL	Sinocyclocheilus anshuiensis	XP_016322534.1
		Q	G	T	Fish	VSA QGT TSQGRCNNVLAADIVFLV	Scleropages formosus	XP_018612087.1
		Q	D	R	Fish	AEA QDR CDNVQAADIVFLV	Oreochromis niloticus	XP_013124693.2
		Q	Q	R	Mammal	VRA QQR ERVTCTRLYAADIVFLL	Canis lupus familiaris	XP_005632359.1
		Q	G	R	Fish	TEA QGR CNNVQAADIVFL	Austrofundulus limnaeus	XP_013864464.1
		Q	H	P	Mammal	ARA QHP DRVTCTRLYAADIVFLL	Sorex araneus	XP_004615198.1
		Q	H	G	Mammal	VRA QHG ERVTCTRLYAADIVFLL	Loxodonta africana	XP_010588429.1
		Q	L	R	Mammal	VRA QLR ERVTCTRLYSADIVFLL	Chrysochloris asiatica	XP_006873721.1
		Q	H	R	Mammal	VRA QHR ERVTCTRLYAADIVFLL	Cercocebus atys	XP_011888958.1
		E	K	R	Reptile	VSA EKR NQGTCINVYAADIVFL	Chelonia mydas	XP_007060080.1
		Q	K	R	Bird	AMA QKR NQAVCEDVLEADIVFL	Aptenodytes forsteri	XP_019328977.1
		Q	K	R	Reptile	VMA QKR ERVICTNVYLADIVFL	Protobothrops mucrosquamatus	XP_015680287.1
		Q	T	R	Mammal	VRA QTR ERVTCTRLYSADIVFLL	Elephantulus edwardii	XP_006893082.1
		Q	A	R	Mammal	VQA QAR ERVTCTRLYAADIVFLL	Ochotona princeps	XP_004581802.1
		Q	S	R	Mammal	VRA QSR EQVTCTRLYAADIVFLL	Oryctolagus cuniculus	XP_008258833.1
		Q	P	G	Mammal	VRA QPG ERVTCTRLYAADIVFLL	Eptesicus fuscus	XP_008155913.1
		Q	P	R	Mammal	ARA QPR ERVTCTRLYAADIVFLL	Erinaceus europaeus	XP_016048212.1
